# Supplementary material for: Obviating the need for nanocrystallites in the extended lithiation/de-lithiation of germanium
Source: Royal Society of Chemistry journal article supplement (doi:10.1039/c5ta04941e), 2015-01-01
Supplement: c5ta04941e1.pdf [file c5ta04941e1.pdf]

Supporting Information  
for

# Obviating the need for nanocrystallites in the extended lithiation/de-lithiation of germanium

*Emily J. Powell<sup>a</sup>, Sean M. Wood<sup>b</sup>, Hugo Celio<sup>d</sup>, Adam Heller<sup>b</sup>, and C. Buddie  
Mullins<sup>\*abcd</sup>*

<sup>a</sup>Department of Chemistry, <sup>b</sup>McKetta Department of Chemical Engineering,  
<sup>c</sup>Center for Electrochemistry, <sup>d</sup>Texas Materials Institute and Center for Nano- and  
Molecular Science, University of Texas at Austin, 1 University Station, C0400  
Austin, TX 78712-0231, United States

\*mullins@che.utexas.edu

## Supplementary Calculations

**Calculation S1.** Calculations for determining the percent composition of the Ge(82.35%)-  
GeTe(17.65%) composite.

$$GeTe = 15 \text{ since we begin with 15\% Te}$$

$$Ge = 85 - 15 = 70$$

$$\% \text{ of } GeTe = \frac{15}{70 + 15} * 100\% = 17.65$$

$$\% \text{ of Ge} = \frac{70}{70 + 15} * 100\% = 82.35\%$$

**Calculation S2.** Example calculation for determining the theoretical capacity of  $\text{Ge}_{0.85}\text{Te}_{0.15}$ . The theoretical capacities of  $\text{Ge}_{0.85}\text{Te}_{0.15}$  and  $\text{Ge}_{0.88}\text{Te}_{0.12}$  are  $1056 \text{ mA h g}^{-1}$  and  $1116 \text{ mA h g}^{-1}$ , respectively.

Li reacts with Ge to form a final alloy composition of  $\text{Li}_{3.75}\text{Ge}$ . This is the only compound that contributes to the capacity as we are not cycling in a voltage range in which  $\text{Li}_2\text{Te}$  is reversibly lithiated and delithiated.

The equation for calculating specific capacity is:

$$\text{specific capacity} = \frac{(\text{Faraday's constant}, 96485 \text{ C mol}^{-1}) / (3600 \frac{\text{seconds}}{\text{hour}}) * (\# \text{ electrons})}{\text{molar mass of compound}}$$

The molar mass was calculated as follows:

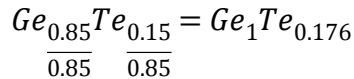

$$\text{molar mass} = (\text{molar mass Ge}, 72.63 \text{ g mol}^{-1}) + (0.176) * (\text{molar mass Te}, 127.6 \text{ g mol}^{-1})$$

$$\text{molar mass} = 95.15 \text{ g mol}^{-1}$$

$$\text{specific capacity} = \frac{(26.8 \text{ Ah}) * (3.75 \text{ mol})}{95.15 \text{ g mol}^{-1}} * \frac{1000 \text{ mA}}{\text{A}} = 1056 \text{ mA h g}^{-1}$$

The Coulombic efficiency (CE) for the first cycle of Ge and  $\text{Ge}_{0.85}\text{Te}_{0.15}$ , respectively, is 77.2% and 71.1%. The CE for the second cycle of Ge and  $\text{Ge}_{0.85}\text{Te}_{0.15}$ , respectively, is 96.2% and 94.7%. The average CE for cycles 3-500 of Ge and  $\text{Ge}_{0.85}\text{Te}_{0.15}$ , respectively, are 99.5% and 98.2%. The capacity increases over the first few cycles, ; we hypothesize that during lithiation the micrometer-sized particles break up slightly and expose new germanium surface area. The increased surface area and reduced particle size allows each particle to be more completely

lithiated, which accounts for the increased capacity. The lower CE for  $\text{Ge}_{0.85}\text{Te}_{0.15}$  corresponds to the loss of  $\text{Li}^+$  to the lithiated interphase layer formed on newly exposed germanium surfaces.

### Supplementary Figures

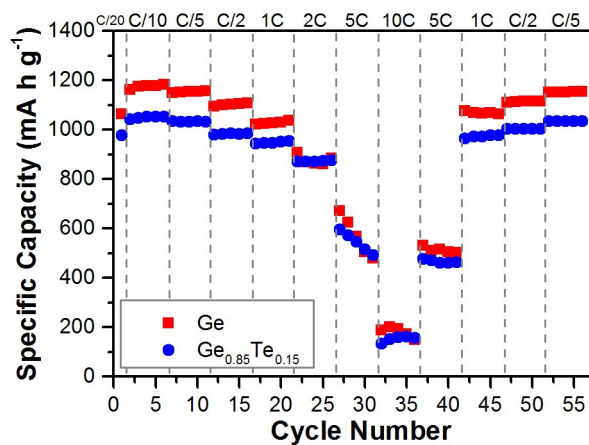

**Figure S3.** A plot of the capacity values at varying current densities for  $\text{Ge}_{0.85}\text{Te}_{0.15}$  and Ge.

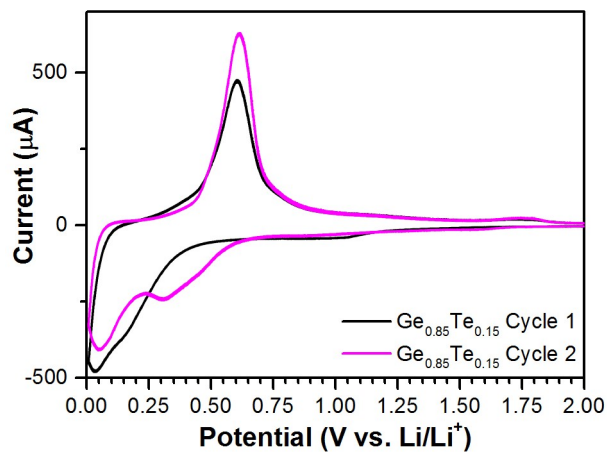

**Figure S4.** First and second cycle CVs of  $\text{Ge}_{0.85}\text{Te}_{0.15}$ .

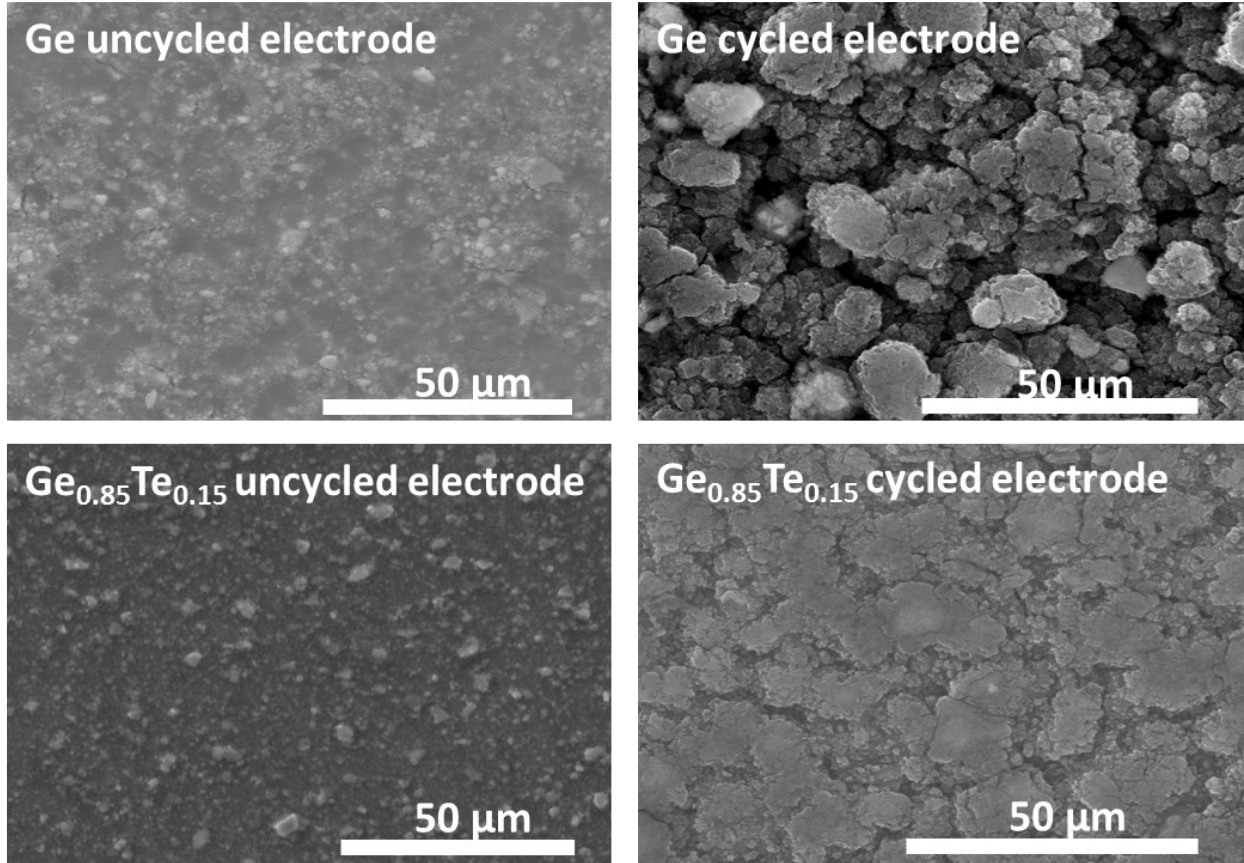

**Figure S5.** SEM comparison of uncycled and cycled Ge and Ge<sub>0.85</sub>Te<sub>0.15</sub> electrodes.

| Material                               | Initial Charge Capacity (mA h g <sup>-1</sup> ) | Capacity Retention (%)                                 | Cycles | Cycling Voltage Window (V vs. Li/Li <sup>+</sup> ) | Charging rate                    | Coulombic Efficiency (CE) (%)  | Synthesis                                | Particle size | Citation     |
|----------------------------------------|-------------------------------------------------|--------------------------------------------------------|--------|----------------------------------------------------|----------------------------------|--------------------------------|------------------------------------------|---------------|--------------|
| Ge <sub>0.85</sub> Te <sub>0.15</sub>  | 1043                                            | 96                                                     | 500    | 0.005-1.25                                         | 1C (1.6 A g <sup>-1</sup> )      | 98                             | facile melt-quench technique             | 3-5 μm        | Current work |
| CuGeO <sub>3</sub> @RGO                | 1157                                            | 780 mA h g <sup>-1</sup> after 130 cycles (67%)        | 130    | 0.02-3                                             | 100 mA g <sup>-1</sup>           | ~100                           | hydrothermal                             | nanowires     | 19           |
|                                        |                                                 | 550 mA h g <sup>-1</sup> after 300 cycles (48%)        | 300    |                                                    | 2 A g <sup>-1</sup>              |                                |                                          |               |              |
| 0-D Ge nanoparticles                   | 1428 (initial discharge capacity)               | 1162 mA h g <sup>-1</sup> after 100 cycles at 1C (85%) | 100    | 0-1.2                                              | 1C (1.6 A g <sup>-1</sup> )      | 95                             | thermal annealing followed by HF etching | nanoparticles | 22           |
| 3-D Ge nanoparticles                   | 1380 (initial discharge capacity)               | 1415 mA h g <sup>-1</sup> after 100 cycles at 1C (95%) | 100    | 0-1.2                                              | 1C (1.6 A g <sup>-1</sup> )      | 99                             | thermal annealing followed by HF etching | nanoparticles | 22           |
| Ge nanoparticles/N-doped RGO composite | 1475 (initial discharge capacity)               | 700 mA h g <sup>-1</sup> after 200 cycles              | 200    | 0-1.5                                              | 0.5 A g <sup>-1</sup>            | 99                             | PVP-assisted thermal reduction           | ~5 nm         | 24           |
| Ge nanotubes                           | 1022                                            | 1002 mA h g <sup>-1</sup> after 400 cycles (98%)       | 400    | 0-1.5                                              | 0.2C (200 mA h g <sup>-1</sup> ) | >99                            | Kirkendall effect at 700°C               | nanotubes     | 21           |
| Ge nanowire sheathed with C            | 963                                             | 72% after 100 cycles                                   | 100    | 0-1.5                                              | 0.5C (400 mA g <sup>-1</sup> )   | 91                             | solid-liquid solution method             | ~80 nm        | 20           |
| Ge@C core-shell nanoparticles          | 938                                             | ~950 mA h g <sup>-1</sup> after 50 cycles              | 50     | 0-1                                                | 50 mA g <sup>-1</sup>            | >90% for 50 cycles             | solution-based method                    | nanoparticles | 25           |
| Calcium germanate                      | 420                                             | ~600 mA h g <sup>-1</sup>                              | 100    | 0.02-3                                             | 100 mA h g <sup>-1</sup>         | not reported for these results | hydrothermal                             | nanowires     | 20           |
| Barium germanate                       | 568                                             | ~400 mA h g <sup>-1</sup>                              | 100    | 0.02-3                                             | 100 mA h g <sup>-1</sup>         | not reported for these results | hydrothermal                             | nanowires     | 20           |

**Table S6.** A comparison of the electrochemical cycling data of the current work with several other papers studying germanium materials.

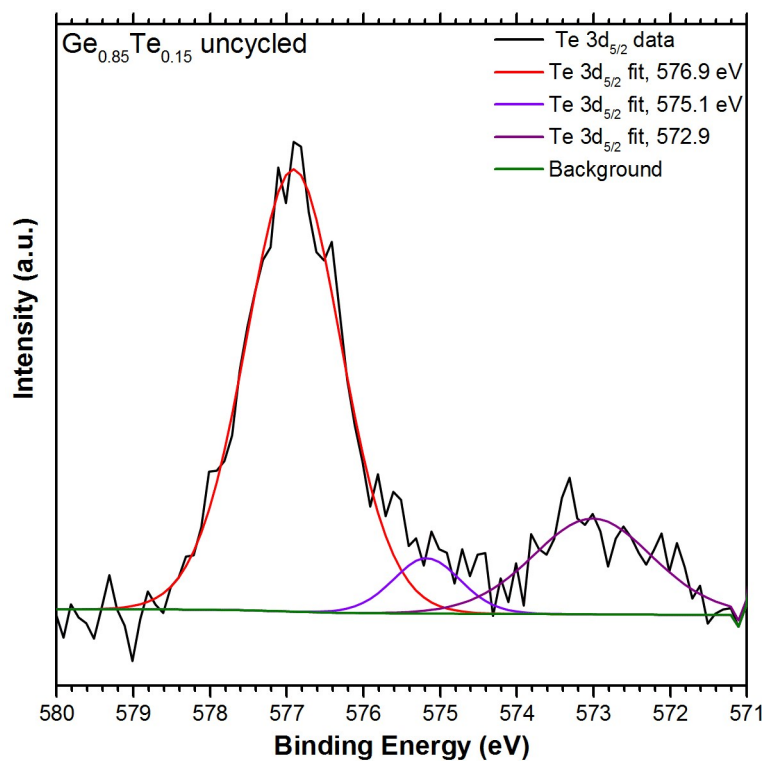

**Figure S7.** XPS of uncycled Ge<sub>0.85</sub>Te<sub>0.15</sub> electrode after exposure to air.

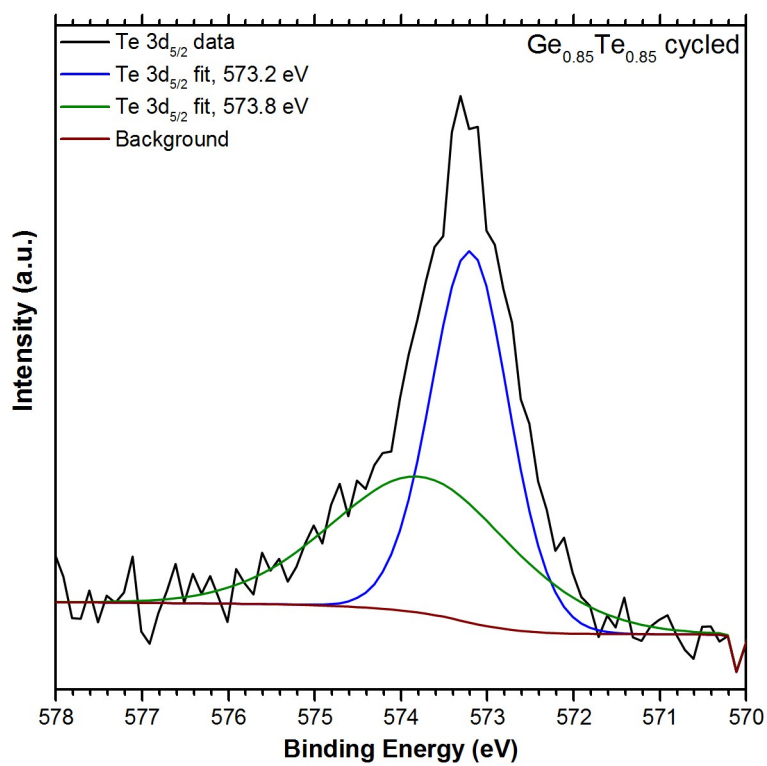

**Figure S8.** XPS of cycled Ge<sub>0.85</sub>Te<sub>0.15</sub> electrode after at least 500 cycles.
